# MiR-3613-3p affects cell proliferation and cell cycle in hepatocellular carcinoma

Donghui Zhang<sup>1</sup>, Enqin Liu<sup>1</sup>, Jian Kang<sup>2</sup>, Xin Yang<sup>3</sup> and Hong Liu<sup>1</sup>

<sup>1</sup>Department of Infectious Disease, Linyi People's Hospital, Linyi 276000, China

<sup>2</sup>Department of Colorectal Surgery, Tai'an City Central Hospital, Tai'an 271000, China

<sup>3</sup>Culverhouse College of Commerce and Business Administration, The University of Alabama, Tuscaloosa, AL 35401, USA

Correspondence to: Hong Liu, email: wlb4eo@163.com

Keywords: cell cycle, cell proliferation, hepatocellular carcinoma, hsa-miR-3613-3p

Received: May 04, 2017

Accepted: August 23, 2017

Published: October 10, 2017

Copyright: Zhang et al. This is an open-access article distributed under the terms of the Creative Commons Attribution License 3.0 (CC BY 3.0), which permits unrestricted use, distribution, and reproduction in any medium, provided the original author and source are credited.

## ABSTRACT

Hepatocellular carcinoma (HCC) is one of the most common types of malignant tumors with poor sensitivity to chemotherapy drugs and poor prognosis among patients. In the present study, we downloaded the original data from the Gene Expression Omnibus and compared gene expression profiles of liver cancer cells in patients with HCC with those of colon epithelial cells of healthy controls to identify differentially expressed genes (DEGs). After filtering target microRNAs (miRNA) from core DEGs, we cultured HepG2 cells *in vitro*, knocked down the miRNA and core mRNAs, and analyzed the effects. We found 228 differentially expressed genes between liver cancer tissue and healthy control tissue. We also integrated the protein-protein interaction network and module analysis to screen 13 core genes, consisting of 12 up-regulated genes and 1 down-regulated gene. Five core genes were regulated hsa-miR-3613-3p, therefore we hypothesized that hsa-miR-3613-3p was a critical miRNA. After the transfection procedure, we found that changes in hsa-miR-3613-3p were the most obvious. Therefore, we speculated that hsa-miR-3613-3p was a main target miRNA. In addition, we transfected with si (BIRC5, CDK1, NUF2, ZWINT and SPC24), to target genes that can be targeted by miR-3613-3p. Our data shows that BIRC5, NUF2, and SPC24 may be promising liver cancer biomarkers that may not only predict disease occurrence but also potential personalized treatment options.

## INTRODUCTION

Hepatocellular carcinoma (HCC) is a standout amongst the most well-known threatening tumors. Patients with HCC have poor sensitivity to chemotherapy drugs, and the prognosis among patients is often poor [1, 2]. Selective intervention of cell signal transduction is becoming an effective treatment for malignant tumors. However, the molecular markers of HCC were controversial [3–5]. For the analysis of gene expression, high-throughput platforms such as microarray analysis, are becoming promising tools in the field of medical oncology with great clinical applications. Such clinical applications

include molecular diagnosis, molecular classification of cancers, patient stratification, prognosis prediction, novel drug targets discovery, and tumor response prediction. The cell cycle is regulated by several factors with two main control points: one at the G1/S checkpoint, which controls the cells to enter the S phase (G1 phase detection point), and the other at the G2/M checkpoint, which controls the cells to enter the M phase (G2 detection point). Cell cycle dysregulation is a major hallmark of tumor cells. The ability of normal cells to undergo cell-cycle arrest after DNA damage is crucial for the maintenance of cell integrity. MicroRNAs (miRNAs) are known to play critical roles in pathogenesis of HCC. For example, miR-

122 is a liver-specific microRNA that can inhibit HCC cell growth by inducing G2/M arrest. In HCC, miR-122 is frequently downregulated [6].

The events involved in cell reproduction are governed by oscillations in the activities of cyclin-dependent kinases (CDKs) [7]. Elevated expression of CDK inhibitors results in cell cycle arrest [8]. The inducible depletion of CDK1 activity from cancer cell lines causes accumulation of cells in the G2/M phase, and is accompanied by cell death in a cell line-dependent manner [9]. CDK1 depletion induces irreparable DNA damage, G2/M arrest, and cell death [10]. Baculoviral IAP Repeat Containing 5 (BIRC5) is preferentially expressed in human cancer cells and mediates cancer cell survival and tumor maintenance [11]. In human tumor tissue, BIRC5 has several characteristics, including a high expression level, a close association with proliferative activities, high transfer capacity, and resistance to chemotherapy. This indicates that BIRC5 may be a promising target for cancer therapy [12–14]. Introducing BIRC5 antisense oligonucleotides or BIRC5 inhibitors into cancer cells reduced BIRC5 expression in cells, inhibited cell proliferation, and lowered the cell apoptosis rate [15]. BIRC5 acts as an apoptosis inhibitor, plays, in part, an important role in carcinogenesis, and thus may serve as a promising target for antitumor therapy [16].

Cell proliferation can be regulated by many factors. In addition to the length of the cell cycle, cell DNA replication synthesis and cell proliferation can also be regulated by genes named cell proliferation-related antigens, such as PCNA and Ki67. PCNA is a nuclear protein that is widely expressed in the S phase of the cell cycle. Together with DNA polymerase cofactors, PCNA participates in the regulation of DNA synthesis [17]. Given that the S phase of the cell cycle is the stage where cells actively undergo DNA replication, the level of PCNA expression may reflect the cell proliferation activity. Ki67 is a marker that reflects tumor cell proliferation and can be used an indicator of tumor proliferation and the degree of malignancy.

Furthermore, NUF2 has been reported to play a role in tumorigenesis of various types of human cancers. Studies have shown that depletion of NUF2 by specific siRNAs inhibited cell proliferation. Silencing of NUF2 significantly inhibited the proliferation of cancer cells *in vitro*, through inducing cell cycle arrest at the G0/G1 phase [18]. SPC24 plays an essential role in coupling kinetochore to spindle microtubules and in the precise segregation of chromosomes during mitosis [19]. siRNA-mediated silencing of SPC24 dramatically suppressed cell growth and increased apoptosis in HCC cells [20]. Specific siRNAs targeting ZW10 interactor (ZWINT), a known component of the kinetochore complex required for the mitotic spindle checkpoint, diminished effects of ZWINT on cell proliferation [21].

Thus, regulation of proteins that mediate critical events of the cell-cycle may represent a potent anti-tumor approach [22]. Studying the relation between cell cycle

regulatory and tumorigenesis is a hot topic in the field of tumor research. In the present study, we obtained the original data from Gene Expression Omnibus (GEO) (<http://www.ncbi.nlm.nih.gov/geo>). Gene expression profiles from the cancer cells of patients with HCC were compared with epithelial cells of healthy colon to identify DEGs. We filtered target miRNAs of core DEGs, cultured HepG2 cells *in vitro*, knocked down miRNA and core mRNAs, and evaluated the effects caused by the target miRNA and core mRNAs. This study will further gain further insights into the development of HCC at the molecular level and explores the potential of candidate biomarkers for diagnosis, prognosis, and drug discovery.

## RESULTS

### Identification of DEGs

A total of 3383 and 1459 DEGs were identified from GSE95698 and GSE41804 datasets, respectively. Among these two sets of DEGs, 246 genes presented similar trends in expression levels (Figure 1). When comparing liver cancer tissue to healthy control tissue, 71 genes were up-regulated genes while 157 genes were down-regulated.

### Functional and pathway enrichment analysis

All DEGs were uploaded into the online Database for Annotation, Visualization and Integrated Discovery (DAVID) software to identify overrepresented Gene Ontology (GO) categories and Kyoto Encyclopedia of Genes and Genomes (KEGG) pathways. The up-regulated genes were mainly involved in biological processes (BP) associated with cellular responses to amino acid stimuli, positive regulation of exit from mitosis, microtubule-based movement, regulation of cell cycle and translesion synthesis. The down-regulated DEGs were enriched in oxidation-reduction processes, cellular response to cadmium ions, complement activation, response to estradiol and complement activation, and lectin pathways. Regarding the cellular component (CC), the up-regulated DEGs were enriched in the cytoplasm, nuclei, caveolae, collagen trimers, and ndc80 complexes. The down-regulated DEGs were enriched in the extracellular region, blood microparticles, extracellular space, integral components of the plasma membrane and the organelle membrane. In addition, GO molecular function (MF) analysis displayed that the up-regulated DEGs were significantly enriched in chromatin binding, phosphatidylinositol phospholipase C activity, ATP binding, and cysteine-type endopeptidase inhibitor activity. Down-regulated DEGs were enriched in serine-type endopeptidase activity, carbohydrate binding, monooxygenase activity, iron ion binding, and heparin binding (Table 1).

Moreover, four KEGG pathways were over-represented in the cell cycle, p53 signaling pathway,

protein digestion and absorption, amoebiasis, and the thyroid hormone signaling pathway. Down-regulated DEGs were enriched in complement and coagulation cascades, metabolic pathways, chemical carcinogenesis, tryptophan metabolism and biosynthesis of antibiotics (Table 2).

### Protein-protein interaction network construction and modules selection

A significant module was obtained from the protein-protein interaction (PPI) network of DEGs using Molecular Complex Detection (MCODE) (Figure 2), including 12 up-regulated genes and 1 down-regulated gene.

Functional and KEGG pathway enrichment analysis revealed that the genes in this module were mainly associated with the cell cycle, colorectal cancer, p53 signaling pathway, progesterone-mediated oocyte maturation, oocyte meiosis, hepatitis B, and herpes simplex infection (Table 3).

### DEG-mRNA pairs

A total of 13 differentially expressed mRNAs were screened, consisting of 12 up-regulated and 1 down-

regulated mRNAs. Results indicated that hsa-miR-3613-3p was common among 5 up-regulated genes, including NUF2, BIRC5, CDK1, ZWINT, and SPC24.

### Core genes overexpressed in human liver cancer tissues

To identify the core genes that are targeted by hsa-miR-3613-3p, we first analyzed hsa-miR-3613-3p protein expression in clinical specimens from the human protein atlas. We found that BIRC5, CDK1, NUF2, ZWINT, and SPC24 were highly expressed in liver cancer tissues, whereas expression was weak in normal tissues (Figure 3).

### Expression of mRNA of these common differentially expressed genes in tissues

The mRNA expression levels of these core genes were consistent with the results of our bioinformatics analysis (Figure 4). Compared with the control group, the mRNA expression of BIRC5, CCNB1, CDK1, CENPE, DLGAP5, KIF18A, KIF20A, NUF2, FOS, PTTG1, SPC24, TOP2A, and ZWINT displayed different levels of upregulation ( $P < 0.05$ ).

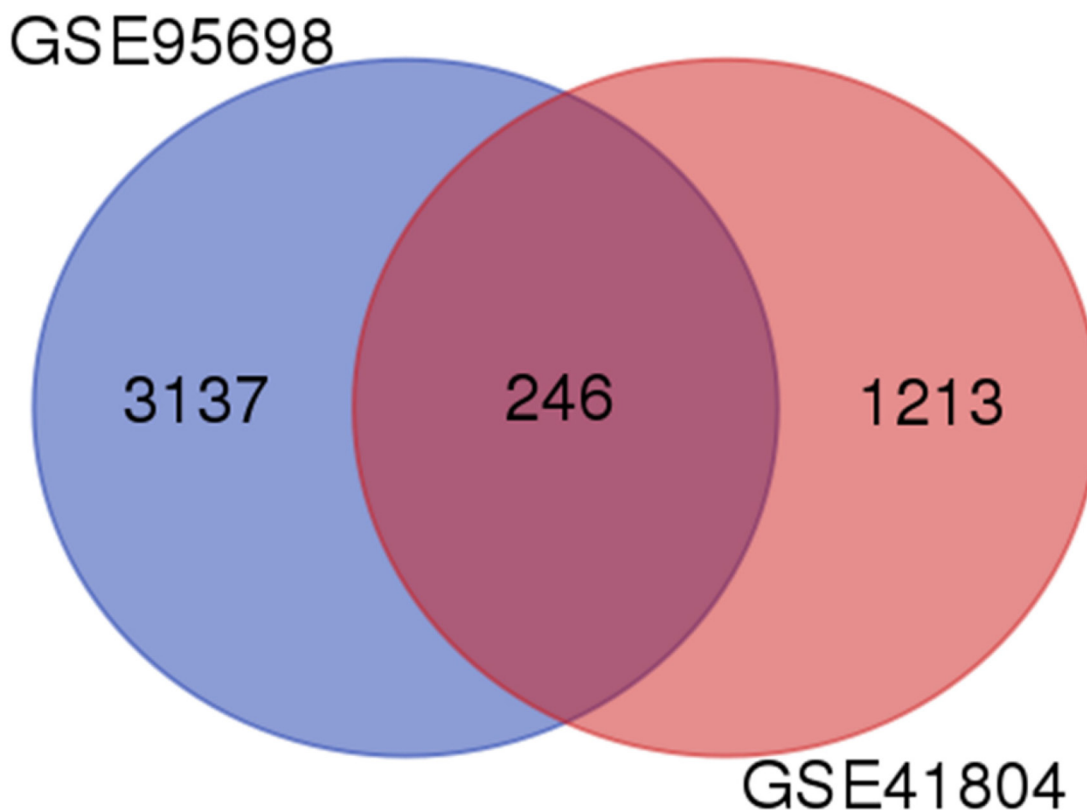

**Figure 1: Identification of differentially expressed genes in mRNA expression profiling datasets.** Two human gene expression profiles (GSE95698 and GSE41804) contained data of cancer and non-cancerous tissues and were analyzed by Affymetrix Human Genome U133 Plus 2.0 Array.

**Table 1: Gene ontology analysis of differentially expressed genes**

|                | Category  | No         | Item name                                      | Gene number | P value  |
|----------------|-----------|------------|------------------------------------------------|-------------|----------|
| Up-regulated   | BP_DIRECT | GO:0071230 | cellular response to amino acid stimulus       | 3           | 1.28E-02 |
|                |           | GO:0031536 | positive regulation of exit from mitosis       | 2           | 2.13E-02 |
|                |           | GO:0007018 | microtubule-based movement                     | 3           | 2.91E-02 |
|                |           | GO:0051726 | regulation of cell cycle                       | 3           | 3.18E-02 |
|                |           | GO:0019985 | translesion synthesis                          | 2           | 3.81E-02 |
|                | CC_DIRECT | GO:0005737 | cytoplasm                                      | 22          | 9.89E-04 |
|                |           | GO:0005634 | nucleus                                        | 20          | 2.52E-03 |
|                |           | GO:0005901 | caveola                                        | 3           | 1.20E-02 |
|                |           | GO:0005581 | collagen trimer                                | 3           | 1.32E-02 |
|                |           | GO:0031262 | Ndc80 complex                                  | 2           | 1.66E-02 |
|                | MF_DIRECT | GO:0003682 | chromatin binding                              | 5           | 2.60E-02 |
|                |           | GO:0004435 | phosphatidylinositol phospholipase C activity  | 2           | 6.02E-02 |
|                |           | GO:0005524 | ATP binding                                    | 9           | 7.07E-02 |
|                |           | GO:0004869 | cysteine-type endopeptidase inhibitor activity | 2           | 7.47E-02 |
| Down-regulated | BP_DIRECT | GO:0055114 | oxidation-reduction process                    | 17          | 2.90E-05 |
|                |           | GO:0071276 | cellular response to cadmium ion               | 4           | 3.39E-04 |
|                |           | GO:0006956 | complement activation                          | 6           | 7.51E-04 |
|                |           | GO:0032355 | response to estradiol                          | 6           | 9.20E-04 |
|                |           | GO:0001867 | complement activation, lectin pathway          | 3           | 1.37E-03 |
|                | CC_DIRECT | GO:0005576 | extracellular region                           | 38          | 1.24E-09 |
|                |           | GO:0072562 | blood microparticle                            | 10          | 3.00E-06 |
|                |           | GO:0005615 | extracellular space                            | 28          | 4.68E-06 |
|                |           | GO:0005887 | integral component of plasma membrane          | 25          | 2.36E-04 |
|                |           | GO:0031090 | organelle membrane                             | 5           | 4.77E-03 |
|                | MF_DIRECT | GO:0004252 | serine-type endopeptidase activity             | 10          | 2.37E-04 |
|                |           | GO:0030246 | carbohydrate binding                           | 8           | 1.10E-03 |
|                |           | GO:0004497 | monooxygenase activity                         | 5           | 1.25E-03 |
|                |           | GO:0005506 | iron ion binding                               | 7           | 1.56E-03 |
|                |           | GO:0008201 | heparin binding                                | 7           | 1.96E-03 |

If there were more than five terms enriched in this category, top five terms were selected according to P value. Count: the number of enriched genes in each term.

**Table 2: KEGG pathway analysis of differentially expressed genes**

|                | ID       | Description                         | Gene count | P value  | Genes                                                                                                                                                                                                         |
|----------------|----------|-------------------------------------|------------|----------|---------------------------------------------------------------------------------------------------------------------------------------------------------------------------------------------------------------|
| Up-regulated   | 04110    | Cell cycle                          | 4          | 6.10E-03 | CCNB1, CDK1, CDKN2A, PTTG1                                                                                                                                                                                    |
|                | 04115    | p53 signaling pathway               | 3          | 1.69E-02 | CCNB1, CDK1, CDKN2A                                                                                                                                                                                           |
|                | 04974    | Protein digestion and absorption    | 3          | 2.73E-02 | COL4A1, COL15A1, COL1A2                                                                                                                                                                                       |
|                | 05146    | Amoebiasis                          | 3          | 4.19E-02 | COL4A1, COL1A2, PLCB1                                                                                                                                                                                         |
|                | 04919    | Thyroid hormone signaling pathway   | 3          | 4.70E-02 | NOTCH3, PLCE1, PLCB1                                                                                                                                                                                          |
| Down-regulated | hsa04610 | Complement and coagulation cascades | 7          | 1.16E-04 | F11, C8A, C9, FGA, MASP1, F2, PLG<br>NDST3, UPP2, ADH1B, GCH1, HK3, ST3GAL6, HAAO, CDA, RGN, DMGDH, AADAT, ST6GAL2, ASMT, CYP2C8, NAT2, HAL, CYP1A2, CYP2E1, GRHPR, DBH, PCK2, TAT, ACSM3, CTH, HMGCS2, UROC1 |
|                | hsa01100 | Metabolic pathways                  | 26         | 1.53E-03 | ST6GAL2, ASMT, CYP2C8, NAT2, HAL, CYP1A2, CYP2E1, GRHPR, DBH, PCK2, TAT, ACSM3, CTH, HMGCS2, UROC1                                                                                                            |
|                | hsa05204 | Chemical carcinogenesis             | 6          | 2.00E-03 | CYP3A43, CYP2C8, NAT2, ADH1B, CYP2E1, CYP1A2                                                                                                                                                                  |
|                | hsa00380 | Tryptophan metabolism               | 4          | 1.01E-02 | AADAT, ASMT, HAAO, CYP1A2                                                                                                                                                                                     |
|                | hsa01130 | Biosynthesis of antibiotics         | 7          | 3.20E-02 | AADAT, CTH, HMGCS2, HK3, RGN, PCK2, TAT                                                                                                                                                                       |

If there were more than five terms enriched in this category, top five terms were selected according to P value. Count: the number of enriched genes in each term.

### Hsa-miR-3613-3p directly targeted the 3'UTR of BIRC5, CDK1, NUF2, ZWINT, and SPC24 in HepG2 cells

To demonstrate a direct interaction between miR-3613-3p and core genes, such as BIRC5, CDK1, NUF2, ZWINT and SPC24, we first determined the transfection efficiency of mir-3613-3p, siBIRC5, siCDK1, siNUF2, siZWINT, and siSPC24 (Figure 5). Next, reporter gene vectors were transfected into HepG2 with miR-3613-3p mimics or negative controls. After 24 hours, luciferase activity in HepG2 cells that were co-transfected with a pMIR-BIRC5 vector and miR-3613-3p mimic decreased to 30.0% compared with control miRNA. Luciferase activity of cells co-transfected with pMIR-CDK1 vector and miR-3613-3p mimic decreased to 40.0% compared with control miRNA. Cells co-transfected with the pMIR-NUF2 vector and miR-3613-3p mimic showed a reduced luciferase activity of 47% compared to control miRNA. Cells co-transfected with the pMIR-ZWINT vector and miR-3613-3p mimic decreased to 44% compared with control miRNA. Cells co-transfected with pMIR-SPC24 vector and miR-3613-3p mimic decreased to 44% compared with control miRNA (Figure 6). When the miR-3613-3p binding site was mutated in the 3'UTR region of the core genes, luciferase

activity was no longer inhibited by miR-3613-3p mimics. These findings demonstrated that hsa-miR-3613-3p reduced the expression of BIRC5, CDK1, NUF2, ZWINT, and SPC24 mRNA and affected cell proliferation.

### The effects of hsa-miR-3613-3p and core genes on cell proliferation

We examined the effects of hsa-miR-3613-3p and core genes on HepG2 cell proliferation by performing CCK-8 assays. The CCK-8 assay demonstrated that hsa-miR-3613-3p mimics inhibited proliferation from 1 day to 4 days (Figure 7). Furthermore, we used the siRNA approach to silence the core genes BIRC5, CDK1, NUF2, ZWINT, and SPC24 in HepG2 cells, and examined the proliferation ability of the cells. Our data indicated that when treated with siBIRC5, the cell viability at 2-4 days decreased compared with that of 0 days. Cells transfected with siCDK1, siNUF2, siZWINT, or siSPC24, showed a reduction in cell viability at 2-4 days after transfection compared with that at day 0. These findings demonstrated that hsa-miR-3613-3p and core genes affected cell proliferation.

Except for CCK8, we evaluated the protein levels of Ki67 and PCNA in HepG2 cells after transfection

**Table 3: KEGG pathway analysis of core genes**

| ID    | Description                             | Gene count | P value  | Genes              |
|-------|-----------------------------------------|------------|----------|--------------------|
| 04110 | Cell cycle                              | 3          | 1.91E-03 | CCNB1, CDK1, PTTG1 |
| 05210 | Colorectal cancer                       | 2          | 3.55E-02 | FOS, BIRC5         |
| 04115 | p53 signaling pathway                   | 2          | 3.78E-02 | CCNB1, CDK1        |
| 04914 | Progesterone-mediated oocyte maturation | 2          | 4.98E-02 | CCNB1, CDK1        |
| 04114 | Oocyte meiosis                          | 2          | 6.17E-02 | CDK1, PTTG1        |
| 05161 | Hepatitis B                             | 2          | 8.12E-02 | FOS, BIRC5         |
| 05168 | Herpes simplex infection                | 2          | 9.77E-02 | CDK1, FOS          |

with hsa-miR-3613-3p mimics and siRNA (Figure 8A). The data indicated that when cells were treated with hsa-miR-3613-3p mimics, the levels of Ki67 and PCNA both decreased compared with negative control group ( $P < 0.05$ ). Moreover, The Ki67 and PCNA protein level also decreased when cells were transfected with siBIRC5, siCDK1 or siZWINT ( $P < 0.05$ ) (Figure 8B, 8C).

Figure 9 showed that after transfection with hsa-miR-3613-3p mimics, the cells in G2/M phase decreased 57% compared with the negative control group, whereas

cells in the G0/G1 phase increased 170% compared with the negative control group ( $P < 0.05$ ). Cells in G2/M decreased 67.9%, 76.2%, 71.4%, 66.6%, and 79.1% when transfected with siBIRC5, siCDK1, siNUF2, siSPC24 and siZWINT compared with the control group ( $P < 0.05$ ).

## DISCUSSION

In this study, we chose two profiles in the GEO database (GSE95698 and GSE41804), and screened

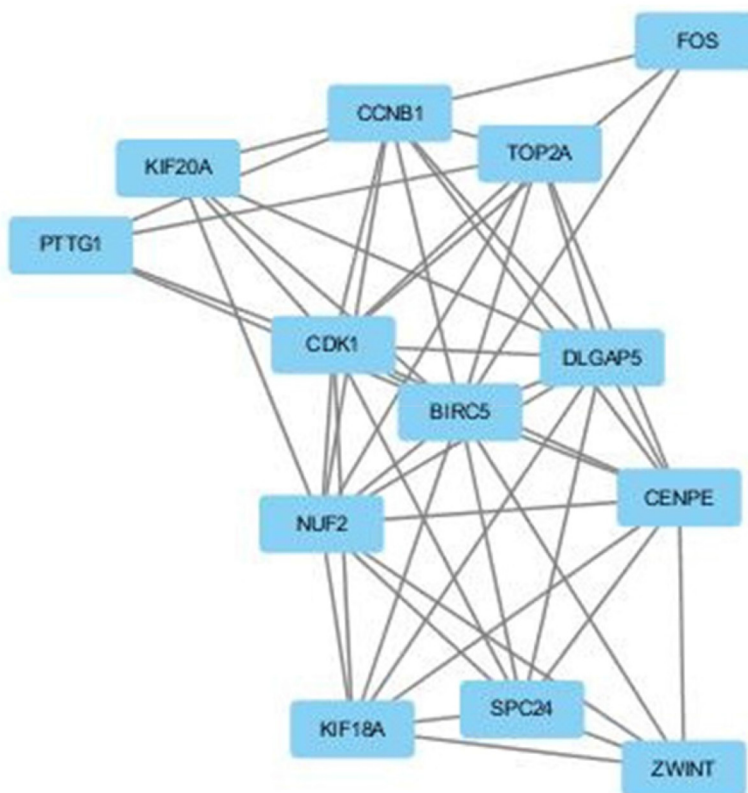

**Figure 2: The protein–protein interaction (PPI) network of DEGs using Molecular Complex Detection (MCODE).** The PPI network of DEGs was constructed using the Search Tool for the Retrieval of Interacting Genes (STRING, <http://string-db.org>) database and was visualized using Cytoscape (<http://www.cytoscape.org/index.html>). MCODE was performed to screen modules of the PPI network with a degree cutoff = 2, node score cutoff = 0.2, K-Core = 2, and Depth from Seed = 100.

246 differentially expressed genes between liver cancer tissue and healthy control samples with GEO2R. Among them, 228 genes presented a similar trend in expression in both datasets. In these 228 DEGs, GO and KEGG pathway enrichment analysis were used. Integration of the PPI network and module analysis were used to screen 13 core genes, consisting of 12 up-regulated genes and 1 down-regulated gene. We predicted mRNA targets via miRWalk2.0 and found that hsa-miR-3613-3p was critical in reducing the expression level of 5 core genes.

After cells were transfected, we determined that changed in hsa-miR-3613-3p were the most obvious. Therefore, we speculated that hsa-miR-3613-3p may be a potential target miRNA. Moreover, we transfected with si (BIRC5, CDK1, NUF2, ZWINT and SPC24), which can all be targeted by miR-3613-3p. Transfected HepG2 cells were tested for cell proliferation and migration. In conclusion, we hypothesized that hsa-miR-3613-3p, BIRC5, CDK1, NUF2, ZWINT, and SPC24 could affect the proliferation of HepG2 cells.

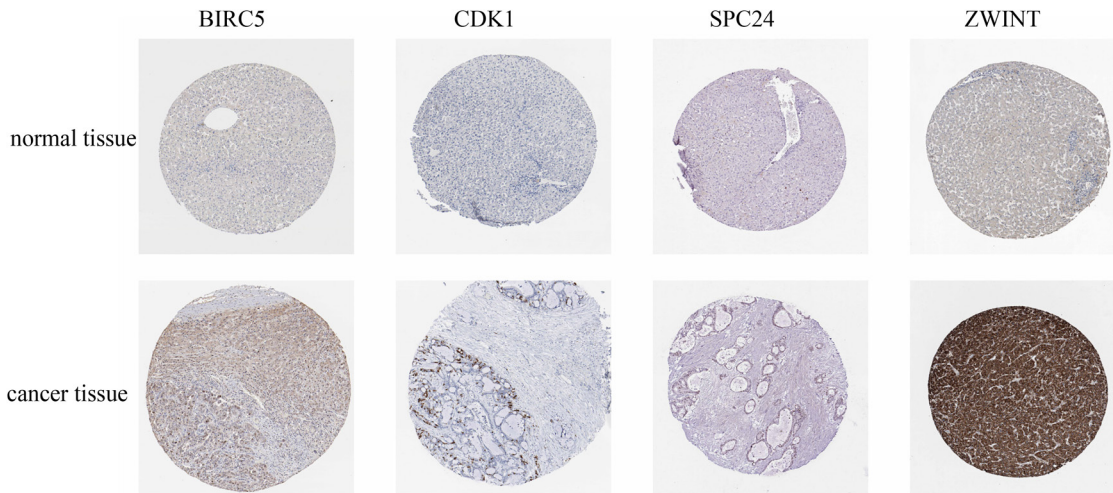

**Figure 3: Immunohistochemistry of core genes in normal and cancerous tissue.** Protein expression of core genes in liver cancer tissue and normal tissue was determined from the human protein atlas ([www.proteinatlas.org](http://www.proteinatlas.org)).

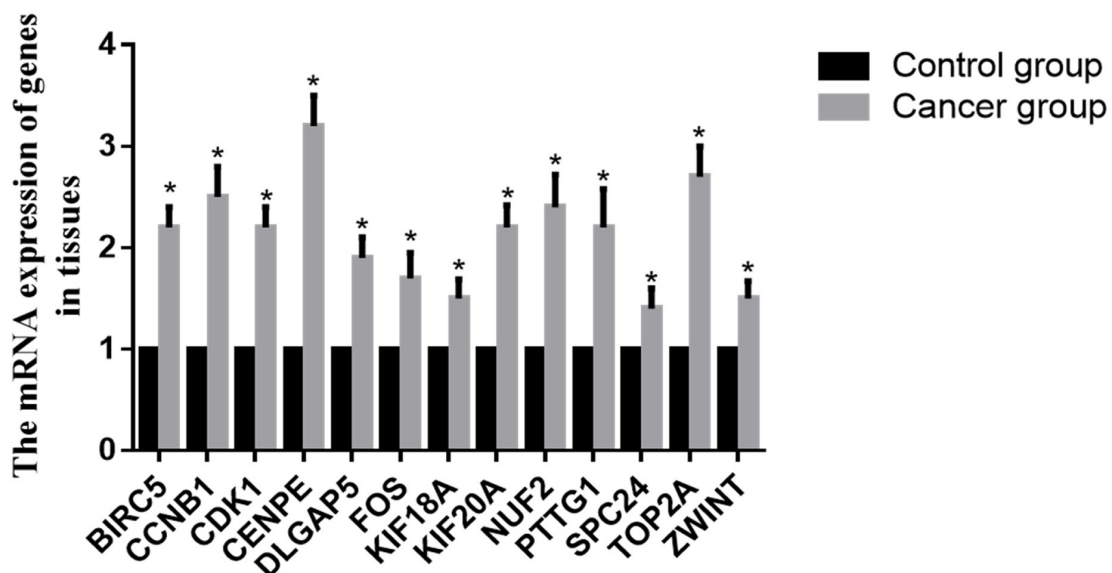

**Figure 4: mRNA expression of core genes in tissue.** Data are presented as the mean  $\pm$  SD. Compared with controls: \*P < 0.05.

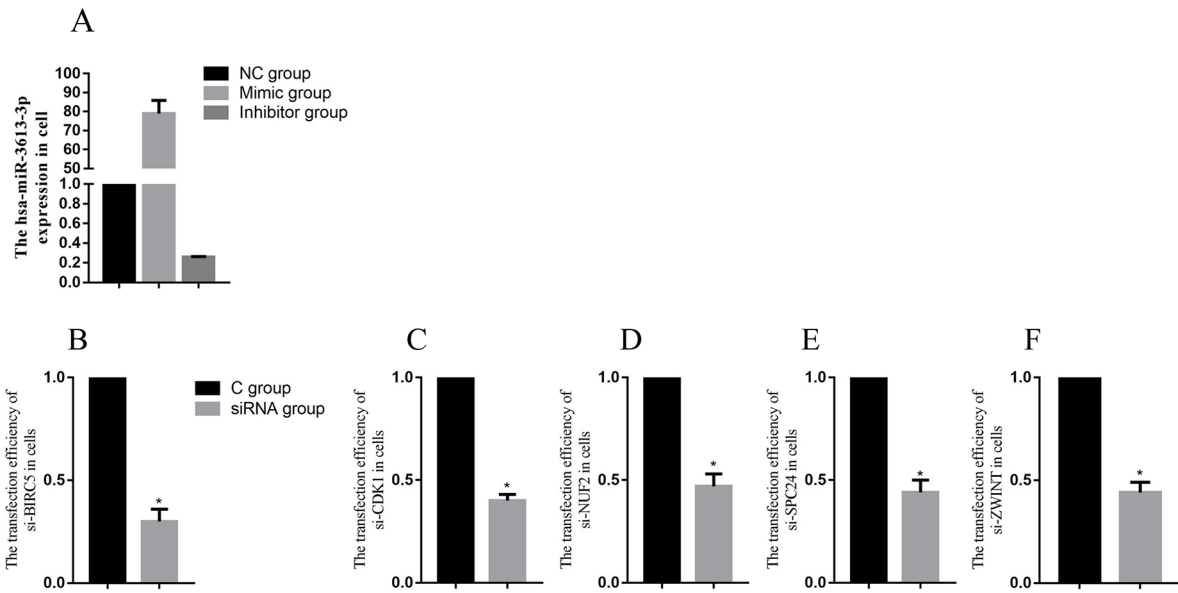

**Figure 5: The transfection efficiency of miRNA and core genes.** Data are presented as the mean  $\pm$  SD. Compared with controls: \*P < 0.05.

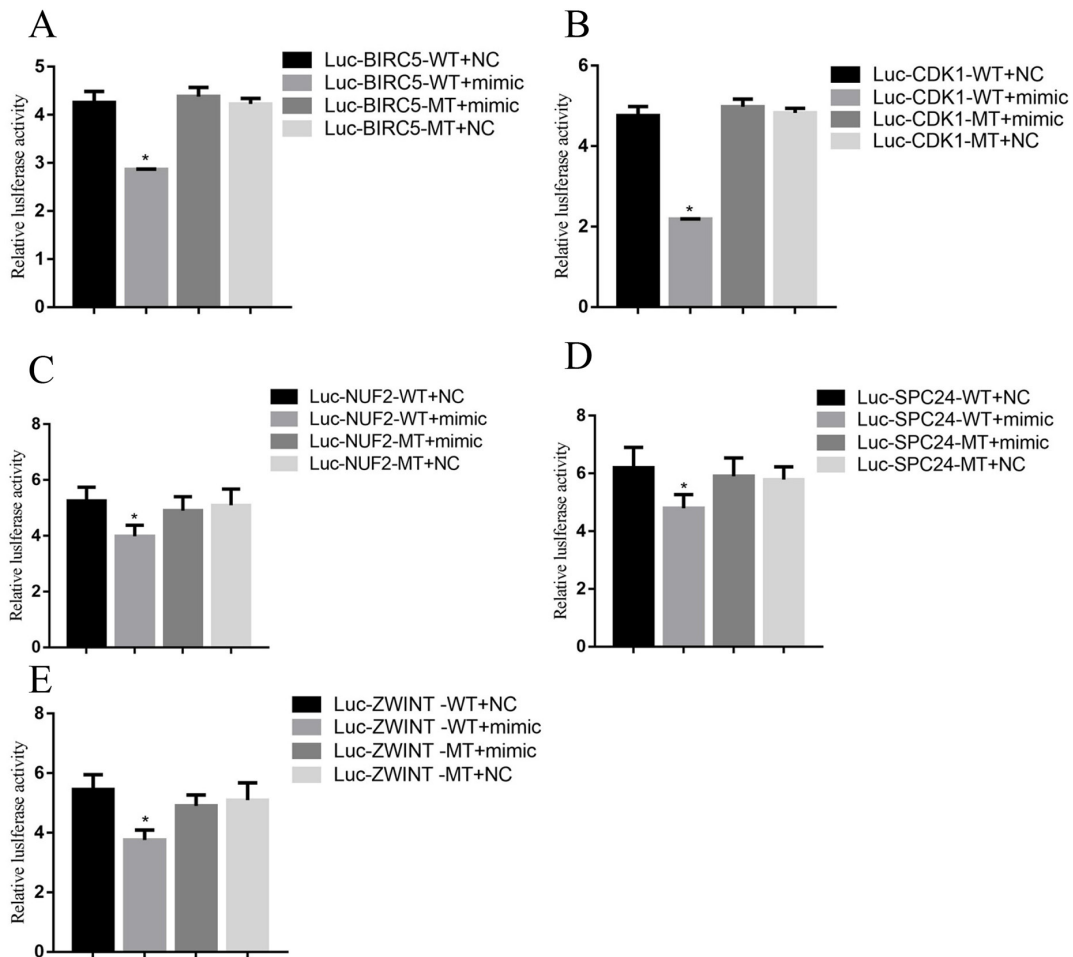

**Figure 6: Luciferase reporter assay.** Data are presented as the mean  $\pm$  SD. Compared with controls: \*P < 0.05.



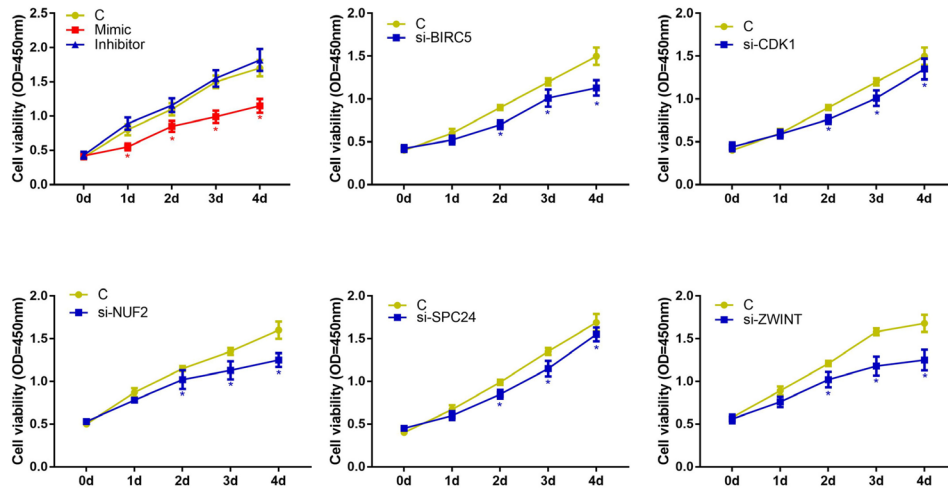

**Figure 7: Cell viability detected by CCK8.** Data are presented as the mean  $\pm$  SD. Compared with controls: \*P < 0.05.

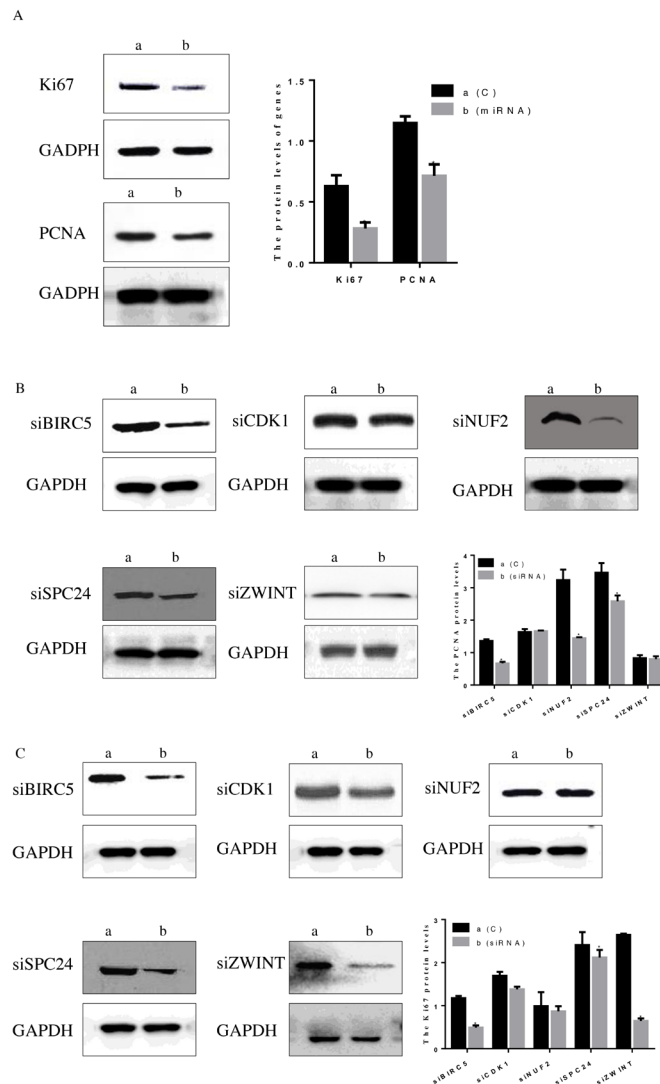

**Figure 8: Protein level of Ki67 and PCNA after treatment with miRNA mimic and simRNA (core mRNA).** (A) Treatment with miRNA, (B) PCNA protein level after treatment with simRNA, (C) Ki67 protein level after treatment with simRNA. Data are presented as the mean  $\pm$  SD. Compared with controls: \*P < 0.05.

**Table 4: List of mRNA primer sequences**

| Primer name | Accession      | Forward Primer (5'-3')    | Reverse Primer (5'-3') |
|-------------|----------------|---------------------------|------------------------|
| BIRC5       | CR541740.1     | CGACGTTGCCCCCTGCCTGG      | GACGACCCCATAGAGGAACAT  |
| CCNB1       | NM_031966.3    | AACATGGCAGGCGCAAAGCGC     | ACCTATGCTGGTGCCAGTGC   |
| CDK1        | NM_001320918.1 | ATGGAAGATTATACAAAATAGA    | ATAGTCAGTCTTCAGGATGT   |
| CENPE       | NM_001286734.1 | GAATCACTTGGAGAACTGCCCA    | CTACAATGGTACTATATTTG   |
| DLGAP5      | NM_001146015.1 | AATAGACATAAGGAATACGAACG   | AAAGCAACTTCAAAAATTGAAA |
| KIF18A      | NM_031217.3    | CCCAAACAAGAAGAAGTCAGTTT   | CCTATGGTGCCACTGGTGCTGG |
| KIF20A      | NM_005733.2    | TGTTTGAGTCCACAGCTGCAGAT   | CACCCAAGGACTCTTTTGCC   |
| NUF2        | NM_145697.2    | CAAGAATGATCTTTATCCAAATCCA | TTAGTACTCATCTGGACT     |
| PTTG1       | CR541685.1     | GCTGGGGTCTGGACCTTCA       | AAGATGACTGAGAAGACTGTTA |
| SPC24       | NM_001317031.1 | TGCTGGGCGCCAACCGCGCGGA    | AGCTGGAAGCTGGGCTTCAG   |
| TOP2A       | NM_001067.3    | TTTTGTTCCTGGTTTGTACAA     | GGTGGTCGAAATGGCTATGGAG |
| ZWINT       | NM_001005413.1 | AGCCAAGATCCTGGTTGAGTTT    | AGGCCCTGACTCAGATGGAGGA |

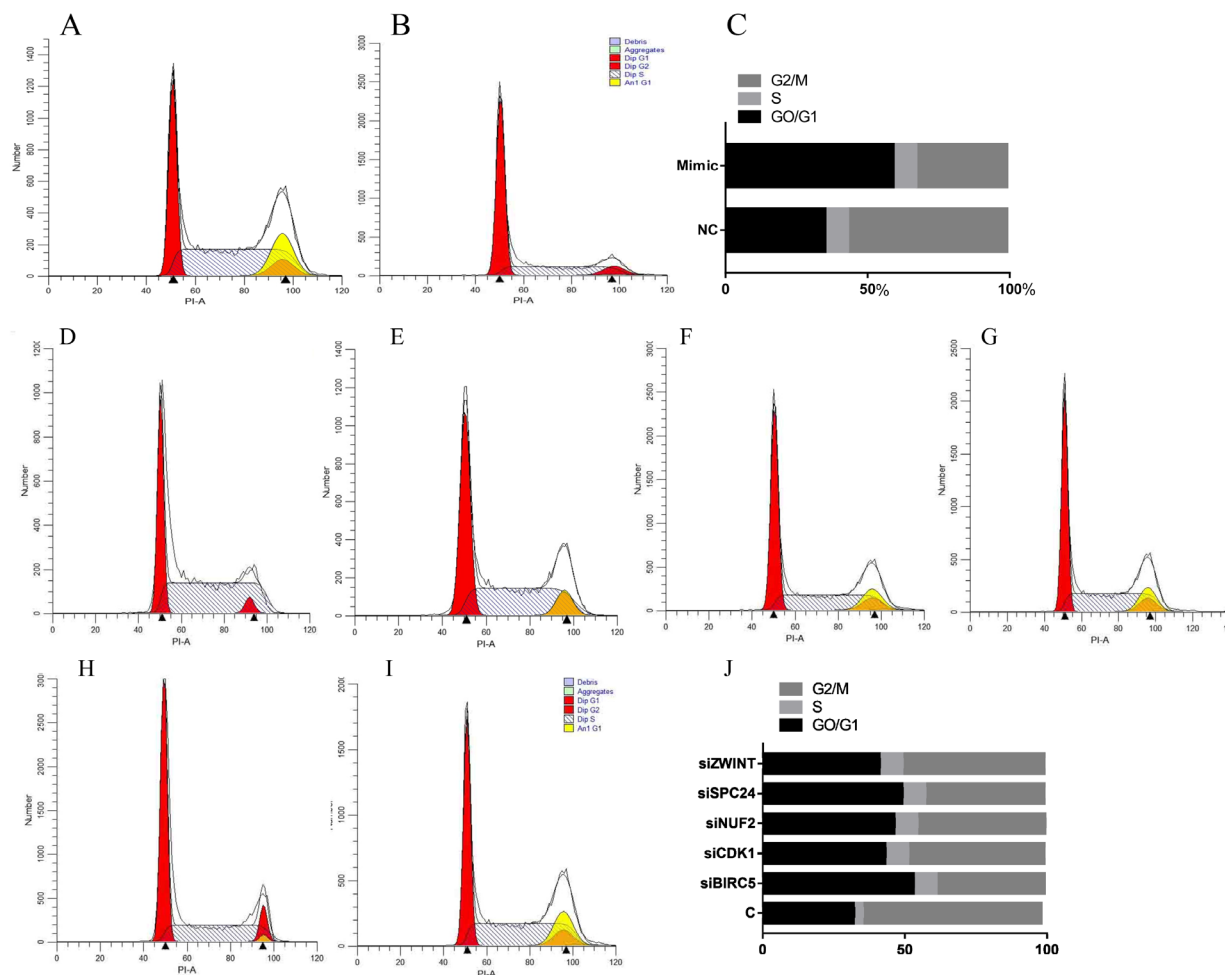

**Figure 9: Cell cycle analysis detected by flow cytometry. (A, D) Control group, (B) miRNA mimic group, (C, J) analysis of cell cycle data, (E) HepG2 treated with siBIRC5, (F) HepG2 treated with siCDK1, (G) HepG2 treated with siNUF2, (H) HepG2 treated with SPC24, (I) HepG2 treated with ZWINT. Data are presented as the mean  $\pm$  SD. Compared with controls: \*P < 0.05.**

**Table 5: Seed regions of miRNA and complementary 3'UTR region of mRNAs**

| mRNA name | Predicted consequential pairing of miRNA | Position site of mRNA 3' UTR |
|-----------|------------------------------------------|------------------------------|
| BIRC5     | UUUUUUG                                  | 237-243                      |
| CDK1      | UUUUUGA                                  | 476-482                      |
| NUF2      | ACAAAAA                                  | 1023-1031                    |
| SPC24     | UUUUUUGA                                 | 97-104                       |
| ZWINT     | UUUUUUG                                  | 698-704                      |

The liver regulates metabolic homeostasis by producing energy and molecules used by other cells in nearby or distant tissues. Liver cancer is ranked in the top ten of human cancers worldwide, and among the top five of cancers in terms of high mortality [5–7]. More than 70% of primary liver cancers [2, 8, 9] are presented as HCC [2, 9]. HCC is one of the most common causes of cancer-related death worldwide. Therefore, developing novel drugs to target HCC has become a major challenge and the focus of numerous studies. Cells go through a series of intracellular biochemical events to achieve proper growth, division of proliferation regulation, and to ensure that the cell cycle is sufficient. Abnormality of cell cycle regulation is the main mechanism of abnormal proliferation of tumor cells. Cell cycle misregulation plays a central role in promoting hepatocarcinogenesis through sustaining proliferative signaling.

In previous studies, BIRC5 has been reported in several malignant tumors. BIRC5 siRNA significantly inhibited cell proliferation in triple-negative breast cancer cells [11]. BIRC5 induced cancer cell apoptosis and cell cycle arrest, thereby efficiently inhibiting the proliferative activity in HCC [23]. BIRC5 protein expression in tumor tissue versus normal tissue was 1.3 times more often elevated in the squamous cell lung cancer group [24]. BIRC5 has been identified in tumorigenesis and progress of colorectal cancer (CRC). In addition, BIRC5 mRNA levels were significantly increased in serum of CRC patients, which indicates its potential to become a promising non-invasive biomarker for diagnosis of CRC [25]. The protein level of Ki67 and PCNA decreased after knocking down BIRC5, indicating that BIRC5 regulated the cell cycle of HepG2 cells. BIRC5 plays a crucial role in cell proliferation, adjusting the cell survival time, inhibiting the role of apoptosis, inhibiting the expression of the downstream product of BIRC5, and promoting cancer cell apoptosis in bladder tumor [26]. Anti-BIRC5 IgG could serve as a biomarker for the early diagnosis of cervical cancer [27].

Progress through the cell cycle is driven by members of the Cyclin-dependent kinase (CDK) family. As an important factor in CDK family, CDK1 is sufficient to drive the mammalian cell cycle. CDK1 was also found to regulate mitochondrial function, which improved cell cycle progression [28]. During the G2 to M transition,

CDK1 activity levels impair DNA repair processes and play a major role in the yield of chromatid breaks induced after G2-irradiation [29]. Medicine induces G2/M phase arrest in human colorectal cancer colon 205 cells through inhibition of CDK1 activity [30]. Without synthesis of CDK1 prior to G2/M transition, the cell cannot enter mitosis, which leads to cell cycle arrest at the G2 phase. Interestingly, no significant differences were found in the protein levels of Ki67 and PCNA after the knockdown of CDK1. Similar findings were observed in the PCNA protein when cells were transfected with siZWINT. Ki67 and PCNA play a key role in the late G1 period, which explained that no changes were observed in Ki67 and PCNA levels.

NUF2 is part of a molecular linker between the kinetochore attachment site and tubulin subunits within the lattice of the attached plus ends [18]. Previous studies have reported that NUF2 is associated with several human cancers. One study reported that knockdown of NUF2 suppressed pancreatic cancer proliferation *in vitro* and *in vivo* [18]. Except for the testis, dysregulation of NUF2 has been reported in the development of several human cancers, including lung cancer, colorectal cancer, prostate cancer, as compared to normal tissue [31, 32]. Depletion of NUF2 resulted in the inhibition of cell proliferation in non-small-cell carcinoma and ovarian cancer [33]. In this study, protein levels of PCNA were significantly down-regulated after NUF2 interference. No significant changes in Ki67 protein were observed, however CCK-8 assay and flow cytometry did identify a difference.

PCNA is a nuclear protein associated with the cell cycle, and PCNA protein levels can be used as a marker to study cell proliferation. There is a clear correlation between up-regulation of PCNA expression and increased cell proliferation [34, 35]. In this study, the protein level of PCNA indicated that PCNA expression was visibly reduced after transfection with siBIRC5, siNUF2, or siSPC24, suggesting that the elevated PCNA expression participated in BIRC5, NUF2, and SPC24-induced cell proliferation.

Therefore, we suggested that BIRC5, NUF2, and SPC24 may be promising biomarkers in human liver cancer that provide information not only for predicting disease occurrence but also for suggesting personalized treatment options.

## MATERIALS AND METHODS

### Microarray analysis

Two human gene expression profiles (GSE95698 and GSE41804) were obtained. The array data of GSE95698 included 20 pairs of samples. GSE41804 contained data from 3 pairs of cancer and non-cancerous tissues analyzed by Affymetrix Human Genome U133 Plus 2.0 Array.

### Data processing

The GEO database archives a large number of high throughput functional genomic studies that contain data that are processed and normalized using various methods. GEO2R (<http://www.ncbi.nlm.nih.gov/geo/geo2r/>) was used to screen differentially expressed genes between CRC and healthy samples. GEO2R performs comparisons on original submitter-supplied processed data tables using the GEO query and limma R packages from the Bioconductor project. Adjusted P values (adj. P) were applied to correct for the occurrence of false positive results using the Benjamini and Hochberg false discovery rate method by default. The adj.  $P < 0.05$  and  $|\log_{2}FC| > 1$  were set as the cut-off criteria.

### Functional and pathway enrichment analysis

The DAVID (<https://david.ncifcrf.gov/home.jsp>) provides researchers with a comprehensive set of functional annotation tools to understand the biological meaning behind a large list of genes. GO and KEGG pathway enrichment analysis were performed for identified DEGs using the DAVID database.  $P < 0.05$  was set as the cut-off criteria.

### Integration of protein-protein interaction network and module analysis

The functional interactions between proteins can provide context in molecular mechanism of cellular processing. In the current study, the PPI network of DEGs was constructed using the Search Tool for the Retrieval of Interacting Genes (STRING, <http://string-db.org>) database and was visualized using Cytoscape (<http://www.cytoscape.org/index.html>). A confidence score  $> 0.4$  was set as the cut-off criteria. Subsequently, the MCODE was performed to screen modules of the PPI network with a degree cutoff = 2, node score cutoff = 0.2, K-Core = 2, and Depth from Seed = 100.

### Prediction of mRNA targets

MiRWalk2.0 (<http://zmf.umm.uni-heidelberg.de/apps/zmf/mirwalk2/miRretrys-self.html>) is freely accessible and comprehensive archived. MiRWalk2.0

provides the largest available collection of predicted and experimentally-verified mRNA-target interactions with various novel and unique features to assist the mRNA research community. MiRWalk2.0 is an integrated resource produced by established mRNA target prediction programs. The genes predicted by miRWalk, RNA22, miRanda, and Targetscan programs were identified as the targets of mRNAs (Table 5).

### Analysis of core protein expression in human liver cancer

Core protein expression in liver cancer tissue and normal tissue was evaluated using the human protein atlas ([www.proteinatlas.org](http://www.proteinatlas.org)) [36].

### Cell culture and transfection

Human liver cancer cell HepG2 were cultured in RPMI 1640 medium (Life Technologies Inc., Cergy, Pontoise, France) supplemented with 10% fetal bovine serum (FBS; Gibco, Grand Island, NY, USA) and 1% penicillin/streptomycin (P/S; Sigma, St. Louis, MO, USA). In addition, HepG2 cells were supplemented with human insulin (0.1 U/mL) and incubated at 37°C in a humidified atmosphere of 5% CO<sub>2</sub>. HepG2 cells were plated in 6-well plates ( $5 \times 10^5$  cell/well) for 24 h at 37°C, and transfected with hsa-miR-3613-3p mimic, hsa-miR-3613-3p, inhibitor, negative control, or small inhibitory RNA (siRNA) against core genes and NC-siRNA (RIBOBIO, Guangzhou, China) using Lipo2000 (Applied Biosystems, Life technologies, USA). Cells were harvested from 12 hours to 48 hours after transfection with miRNA or siRNA.

### Dual luciferase activity assay

To evaluate the binding specificity, we established a wild-type and mutant seed region of core genes (NUF2, BIRC5, CDK1, ZWINT, and SPC24) 3'UTR, which contained the putative target site for the mature hsa-miR-3613-3p, and cloned this into the pGL3-control vector. HepG2 cells were co-transfected with hsa-miR-3613-3p mimic, inhibitor, or negative control, pGL3 - core genes 3'UTR-WT vector, pGL3-core genes 3'UTR-MT vector, and phRL-SV40 control vector (Promega, USA) using Lipo2000 (Applied Biosystems, Life Technologies, USA) in 24-well plates. After 24 hours of transfection, the relative luciferase activity was determined by a Dual-Luciferase Reporter Assay System (Promega, USA) and normalized with renilla luciferase activity using SpectraMax i3 (Molecular Devices, USA).

### CCK-8 assay

Cell proliferation was determined by the Cell Counting Kit-8 (CCK-8). After 24 hours of transfection

with miRNA or siRNA, HepG2 cells ( $1.0 \times 10^3$ ) were plated in 96-well plates and cultured for 1, 2, 3, or 4 days, after with the supernatant was removed and the absorbance was measured at a wavelength of 450 nm.

### Real-time RT-PCR

Total RNA was extracted from tissues and cells using Trizol reagent (Applied Biosystems, Invitrogen, USA). The total RNA was reverse transcribed (Takara Bio Inc., Shiga, Japan) according to the manufacturer's guidelines. Primer analysis software (Oligo 7.24, Molecular BiologyInsights, Inc., USA) was used to design specific oligonucleotide primers (Table 4). Quantitative real-time RT-PCR was performed using an ABI 7900 (Life Technologies). Reactions were performed in 20  $\mu$ L of reaction mixture, containing 10  $\mu$ L PCR master mix (SYBR Premix Ex Taq II; Takara Bio Inc.), 0.4  $\mu$ L primer pairs, and 2  $\mu$ L cDNA. After normalizing to the expression of GAPDH, the relative expression levels of hsa-miR-3613-3p and core genes were calculated by the  $2^{-\Delta\Delta C_t}$  method.

### Western blot analysis

Protein extracts were subjected to SDS-polyacrylamide gel electrophoresis under reducing conditions using 15% gels. Proteins were then transferred to nitrocellulose membranes using tank transfer for 1.5 h at 200 mA in Tris-glycine buffer containing 20% methanol. The membranes were blocked with 5% skim milk for 18-24 h and incubated overnight at 4°C with primary antibodies directed against Ki67 and PCNA (1:1000, Santa Cruz Biotechnology, USA), followed by an anti-rabbit horseradish peroxidase (HRP)-conjugated secondary antibody IgG (1: 2000, Santa Cruz Biotechnology, USA). To verify equal sample loading, membranes were incubated with a monoclonal anti-GAPDH antibody (1: 1000, Santa Cruz Biotechnology, USA), followed by an HRP-conjugated goat anti-mouse IgG (1: 1000, Santa Cruz Biotechnology, USA). Proteins were visualized by and enhanced chemiluminescence system (Cheml Scope5300, Clinx Science Instruments, Shanghai, China).

### Cell cycle detection

Another challenge is the quantitative analysis of cell cycle by flow cytometry. Briefly, after treatment with miRNA and siRNA for 24h, the cells were washed twice with cold PBS and re-suspended in binding buffer at a concentration of  $3 \times 10^6$  cell/mL according to the instructions provided with the cell cycle detection Kit (BD Biosciences). The cells were incubated for 30 min at room temperature in the dark and analyzed by flow cytometry within 1 h after completion of the staining.

### Statistical analysis

All statistical parameters were calculated using GraphPad Prism 7.0 software. Values are expressed as the mean  $\pm$  standard deviation (SD). Comparisons of two groups were performed using a Student's t-tests, more than 2 independent groups were compared using one-way analysis of variance (ANOVA).  $P < 0.05$  was considered statistically significant. Ranking of genes by the degree of differential expression was performed by heat map analysis using the Heml 1.0 (<http://hemi.biocuckoo.org/down.php>).

### CONFLICTS OF INTEREST

The authors declare no conflicts of interest.

### REFERENCES

1. Bojanović A, Bosnjaković P, Stojanović M, Marković M, Mrvić M, Radić S, Radovanović Z. [Precision TACE in therapy of primary malignant tumors of liver/hepatocellular carcinoma (HCC)]. [Article in Serbian]. *Acta Chirurgica Iugoslavica*. 2009; 56:143-8.
2. Huang R, Xing Z, Luan Z, Wu T, Wu X, Hu G. A specific splicing variant of SVH, a novel human armadillo repeat protein, is up-regulated in hepatocellular carcinomas. *Cancer Research*. 2003; 63:3775-82.
3. Varma V, Cohen C. Immunohistochemical and molecular markers in the diagnosis of hepatocellular carcinoma. *Advances in Anatomic Pathology*. 2004; 11:239.
4. Yu GR, Kim SH, Park SH, Cui XD, Xu DY, Yu HC, Cho BH, Yeom YI, Kim SS, Kim SB. Identification of molecular markers for the oncogenic differentiation of hepatocellular carcinoma. *Experimental & Molecular Medicine*. 2007; 39:641-52.
5. Stokowska A, Stalke P, Bielawski KP. [Molecular markers of micrometastasis in the blood of hepatocellular carcinoma patients]. [Article in Polish]. *Postępy Higieny I Medycyny Doświadczalnej*. 2007; 61:310-9.
6. Xu Y, Xia F, Ma L, Shan J, Shen J, Yang Z, Liu J, Cui Y, Bian X, Bie P. MicroRNA-122 sensitizes HCC cancer cells to adriamycin and vincristine through modulating expression of MDR and inducing cell cycle arrest. *Cancer Letters*. 2011; 310:160-9.
7. Ubersax JA, Woodbury EL, Quang PN, Paraz M, Blethrow JD, Shah K, Shokat KM, Morgan DO. Targets of the cyclin-dependent kinase Cdk1. *Nature*. 2003; 425:859-64.
8. Bisteau X, Caldez MJ, Kaldis P. The Complex Relationship between Liver Cancer and the Cell Cycle: A Story of Multiple Regulations. *Cancers*. 2014; 6:79.
9. Cai D, Latham VM Jr, Zhang X, Shapiro GI. Combined depletion of cell cycle and transcriptional cyclin-dependent kinase activities induces apoptosis in cancer cells. *Cancer Research*. 2006; 66:9270-80.

10. Johnson N, Cai D, Shapiro G. Concomitant CDK1 and CDK2 depletion induces irreparable DNA damage, G2/M arrest and cell death. *Cancer Research*. 2007; 67:4346.
11. Wang C, Zheng X, Shen C, Shi Y. MicroRNA-203 suppresses cell proliferation and migration by targeting BIRC5 and LASP1 in human triple-negative breast cancer cells. *Journal of Experimental & Clinical Cancer Research*. 2012; 31:58.
12. Liu X, Chen N, Wang X, He Y, Chen X, Huang Y, Yin W, Zhou Q. Apoptosis and Proliferation Markers in Diffusely Infiltrating Astrocytomas: Profiling of 17 Molecules. *Journal of Neuropathology & Experimental Neurology*. 2006; 65:905-13.
13. Shepelev MV, Kopantzev EP, Vinogradova TV, Sverdlov ED, Korobko IV. hTERT and BIRC5 gene promoters for cancer gene therapy: A comparative study. *Oncology Letters*. 2016; 12.
14. Kolberg M, Høland M, Ågesen TH, Skotheim RI, Bjerkeheggen B, Hall KS, Mertens F, Smeland S, Lev DC, Davidson B. Abstract LB-189: BIRC5 (Survivin) is a prognostic biomarker and potential drug target for patients with malignant peripheral nerve sheath tumors. *Cancer Research*. 2013; 73:LB-189.
15. Lamers F, Schild L, Koster J, Versteeg R, Caron HN, Molenaar JJ. Targeted BIRC5 silencing using YM155 causes cell death in neuroblastoma cells with low ABCB1 expression. *European Journal of Cancer*. 2012; 48:763-71.
16. Vayshlya NA, Zinovyeva MV, Sass AV, Kopantzev EP. Increased expression of BIRC5 in non-small cell lung cancer and esophageal squamous cell carcinoma does not correlate with the expression of its inhibitors SMAC/DIABLO and PML. *Molecular Biology*. 2008; 42:579-87.
17. Tsanov N, Kermi C, Delgado J, Serrano L, Maiorano D. Regulation of translesion DNA synthesis by PCNA monoubiquitylation and beyond. 2015.
18. Hu P, Chen X, Sun J, Bie P, Zhang LD. siRNA-mediated knockdown against NUF2 suppresses pancreatic cancer proliferation *in vitro* and *in vivo*. *Bioscience Reports*. 2014; 35:244-8.
19. Le Masson I, Saveanu C, Chevalier A, Namane A, Gobin R, Formont-Racine M, Jaquier A, Mann C. Spc24 interacts with Mps2 and is required for chromosome segregation, but is not implicated in spindle pole body duplication. *Molecular Microbiology*. 2002; 43:1431-43.
20. Zhu P, Jin J, Liao Y, Li J, Yu XZ, Liao W, He S. A novel prognostic biomarker SPC24 up-regulated in hepatocellular carcinoma. *Oncotarget*. 2015; 6:41383-97. <https://doi.org/10.18632/oncotarget.5510>.
21. Endo H, Ikeda K, Urano T, Horie-Inoue K, Inoue S. Terf/TRIM17 stimulates degradation of kinetochore protein ZWINT and regulates cell proliferation. *Journal of Biochemistry*. 2012; 151:139-44.
22. Stewart ZA, Westfall MD, Pietenpol JA. Cell-cycle dysregulation and anticancer therapy. *Trends in Pharmacological Sciences*. 2003; 24:139.
23. Cao L, Li C, Shen S, Yan Y, Ji W, Wang J, Qian H, Jiang X, Li Z, Wu M. OCT4 increases BIRC5 and CCND1 expression and promotes cancer progression in hepatocellular carcinoma. *BMC Cancer*. 2013; 13:82.
24. Knizhnik AV, Kovaleva OV, Laktionov KK. Arf6, RalA, and BIRC5 Protein Expression in Nonsmall Cell Lung Cancer. *Molecular Biology*. 2011; 45:307-15.
25. Wang H, Zhang X, Wang L, Zheng G, Du L, Yang Y, Dong Z, Liu Y, Qu A, Wang C. Investigation of cell free BIRC5 mRNA as a serum diagnostic and prognostic biomarker for colorectal cancer. *Journal of Surgical Oncology*. 2014; 109:574-9.
26. Seth S, Matsui Y, Fosnaugh K, Liu Y, Vaish N, Adami R, Harvie P, Johns R, Severson G, Brown T. RNAi-based therapeutics targeting survivin and PLK1 for treatment of bladder cancer. *Molecular Therapy*. 2011; 19:928-35.
27. Xu Y, Jin Y, Liu L, Zhang X, Chen Y, Wei J. Study of circulating IgG antibodies to peptide antigens derived from BIRC5 and MYC in cervical cancer. *Febs Open Bio*. 2015; 66:198-201.
28. Pulido-Salgado M, Vidal-Taboada JM, Saura J. Comparisons of CCAAT/enhancer binding proteins  $\beta$  and  $\delta$ : basic biology and roles in the CNS. *Progress in Neurobiology*. 2015.
29. Terzoudi GI, Jung T, Hain J, Vrouvas J, Margaritis K, Dontabakoyianni C, Makropoulos V, Angelakis P, Pantelias GE. Increased G2 chromosomal radiosensitivity in cancer patients: the role of cdk1/cyclin-B activity level in the mechanisms involved. *International Journal of Radiation Biology*. 2000; 76:607-15.
30. Deng S, Hu B, An HM. Traditional Chinese Medicinal Syndromes and Treatment in Colorectal Cancer. *Journal of Cancer Therapy*. 2012; 3:888-97.
31. Shiraishi T, Terada N, Yu Z, Suyama T, Luo J, Trock B, Kulkarni P, Getzenberg RH. Cancer/Testis antigens as potential predictors of biochemical recurrence of prostate cancer following radical prostatectomy. *Journal of Translational Medicine*. 2011; 9:1-9.
32. Numnum TM, Makhija S, Lu B, Wang M, Rivera A, Stoffkhalili M, Alvarez RD, Zhu ZB, Curiel DT. Improved anti-tumor therapy based upon infectivity enhanced adenoviral delivery of RNA interference in ovarian carcinoma cell lines. *Gynecologic Oncology*. 2008; 108:34-41.
33. Hayama S, Daigo Y, Kato T, Ishikawa N, Yamabuki T, Miyamoto M, Ito T, Tsuchiya E, Kondo S, Nakamura Y. Activation of CDCA1-KNTC2, members of centromere protein complex, involved in pulmonary carcinogenesis. *Cancer Res*. 2006; 66:10339-48.

34. Hall PA, Levison DA, Woods AL, Yu CCW, Kellock DB, Watkins JA, Barnes DM, Gillett CE, Camplejohn R, Dover R. Proliferating cell nuclear antigen (PCNA) immunolocalization in paraffin sections: An index of cell proliferation with evidence of deregulated expression in some, neoplasms. *Journal of Pathology*. 1990; 162:285-94.
35. Bravo R, Frank R, Blundell PA, Macdonald-Bravo H. Cyclin/PCNA is the auxiliary protein of DNA polymerase-delta. *Nature*. 1987; 326:515-7.
36. Pontén F, Jirstrom K, Uhlen M. The Human Protein Atlas--a tool for pathology. *Journal of Pathology*. 2008; 216:387.
